# Supplementary material
Source: ML conference proceedings conference paper supplement (https://openaccess.thecvf.com/content/WACV2025/html/Wang_Latency_Robust_Cooperative_WACV_2025_paper.html)
Supplement: Supplementary file 1 [file Wang_Latency_Robust_Cooperative_WACV_2025_supplemental.pdf]

## Appendix

### A. Additional implementation details

As mentioned in section 4.2, we adopted multi-scale feature strategy to aggregate intermediate features at multiple spatial resolutions. we detail the implementation of both the multi-scale and single-scale designs. For the multi-scale strategy, we use the deformable attention to directly aggregate the multi-scale features from a ResNet backbone, as illustrated in Fig. 11. Conversely, the single-scale strategy follows a two-step process. First, a feature pyramid network (FPN) is utilized to aggregate multi-scale features. Subsequently, deformable attention is applied to aggregate information at a single spatial resolution as illustrated in Fig. 12. The current implementation leverages the multi-scale strategy for its advantages (an ablation study comparing multi-scale and single-scale fusion strategies is given in section C).

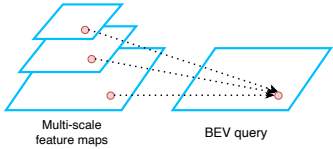

Figure 11. Multi-scale strategy

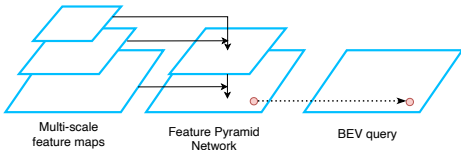

Figure 12. Single-scale strategy

### B. Performance for objects with different speeds

We further investigate the compensation performance of LRCP for objects with different speeds, as shown in Tab. 3. We see that fast-moving objects are significantly more susceptible to latency compared to slower objects. LRCP effectively mitigates the effects of latency for objects across a range of speeds. Nonetheless, in extreme scenarios with both high latency and high-speed objects, the compensation performance of LRCP begins to deteriorate.

### C. Ablation Studies for the main architecture

In LRCP, we use deformable attention to aggregate features from multiple agents, which achieves state-of-the-art performance on two datasets when the latency is zero. We provide ablation studies for our implementation options.

Tab. 4 shows the effect of the number of self/cross attention layers in the feature fusion decoder. Similar to the flow prediction module, using both cross and self-attention layers yields better results than using only cross-attention layers. When stacking 4 cross-attention and 2 self-attention layers, we get the best performance. Tab. 4 provides the ablation of different implementation choices, as mentioned in section 4.2. We see that providing supervision of each agent, using a multi-scale strategy, and using a stronger ResNet backbone can improve detection performance. Specifically, we noticed that using single-scale feature fusion has a large performance drop for the AP@0.7 metric.

### D. Detailed Comparison of 3D detection performance

To assess the effectiveness of LRCP, we conducted thorough experiments on the V2X-Sim and Dair-V2X datasets. Tab. 6 and 7 delve into the object detection performance under varying latency constraints, ranging from 0 to 500 milliseconds. These tables directly correspond to the tabular data presented in Figure 6 of the main text. Our experiments reveal that LRCP consistently outperforms existing methods on both datasets. This advantage becomes even more significant as the allowable processing time for detection increases.

Table 3. Compensation performance for objects with different speeds on Dair-V2X dataset

| Speed           | $v \leq 5 m/s$ |      |      |      | $5 m/s < v \leq 10 m/s$ |      |      |      | $v \geq 10 m/s$ |      |      |      |
|-----------------|----------------|------|------|------|-------------------------|------|------|------|-----------------|------|------|------|
| Metric          | AP@0.5         |      |      |      |                         |      |      |      |                 |      |      |      |
| Latency (ms)    | 0              | 100  | 300  | 500  | 0                       | 100  | 300  | 500  | 0               | 100  | 300  | 500  |
| Deformable attn | 79.1           | 78.8 | 77.0 | 71.6 | 90.5                    | 88.7 | 51.7 | 50.3 | 90.2            | 71.0 | 39.8 | 59.8 |
| LRCP            | 78.7           | 78.7 | 78.5 | 78.2 | 90.2                    | 90.3 | 89.1 | 86.5 | 88.3            | 88.9 | 86.2 | 77.4 |
| Metric          | AP@0.7         |      |      |      |                         |      |      |      |                 |      |      |      |
| Latency (ms)    | 0              | 100  | 300  | 500  | 0                       | 100  | 300  | 500  | 0               | 100  | 300  | 500  |
| Deformable attn | 67.9           | 67.0 | 64.6 | 61.3 | 81.5                    | 59.6 | 45.1 | 45.5 | 81.4            | 38.1 | 35.7 | 54.0 |
| LRCP            | 67.6           | 67.3 | 66.8 | 66.4 | 80.5                    | 79.5 | 76.3 | 71.6 | 79.1            | 76.4 | 67.9 | 58.2 |

Table 4. Effect of the number of self/cross attention layers in the feature fusion decoder, experimented on Dair-V2X datasets

| layers           | AP@0.5      | AP@0.7      |
|------------------|-------------|-------------|
| 3 cross          | 80.2        | 68.8        |
| 2 cross+1 self   | 80.5        | 69.3        |
| 6 cross          | 80.8        | 69.3        |
| 4 cross+2 self   | <b>80.9</b> | <b>70.1</b> |
| 6 cross + 2 self | 79.2        | 68.6        |

Table 5. Ablation of implementation options, experimented on Dair-V2X datasets

| Supervise single | Multi-scale | ResNet backbone | AP@0.5      | AP@0.7      |
|------------------|-------------|-----------------|-------------|-------------|
| ✓                | ✓           | ✓               | <b>80.9</b> | <b>70.1</b> |
|                  | ✓           | ✓               | 80.1        | 68.3        |
| ✓                |             | ✓               | 79.3        | 59.6        |
| ✓                | ✓           |                 | 80.9        | 68.7        |

Table 6. Comparison of 3D detection performance on the V2X-Sim

| Latency(ms)            | 0           | 200         | 400         | 600         |
|------------------------|-------------|-------------|-------------|-------------|
| Single                 | 76.7        |             |             |             |
| Metric                 | AP@0.5      |             |             |             |
| V2X-ViT                | 88.8        | 87.2        | 84.3        | 82.9        |
| Openv2v                | 80.0        | 79.6        | 78.8        | 78.2        |
| Where2comm             | 86.8        | 84.6        | 80.8        | 79.7        |
| Cobeflow               | 86.8        | 85.2        | 83.3        | 82.4        |
| DeformableAttn+Syncnet | 89.4        | 87.5        | 84.7        | 84.3        |
| Deformable attn        | 89.4        | 87.5        | 83.9        | 82.3        |
| LRCP (ours)            | <b>89.4</b> | <b>89.3</b> | <b>89.2</b> | <b>88.3</b> |
| Metric                 | AP@0.7      |             |             |             |
| Single                 | 65.8        |             |             |             |
| V2X-ViT                | 79.3        | 75.6        | 73.9        | 73.2        |
| Openv2v                | 68.1        | 66.9        | 66.4        | 66.5        |
| Where2comm             | 83.8        | 77.4        | 75.0        | 74.4        |
| Cobeflow               | 83.8        | 79.2        | 78.1        | 76.2        |
| DeformableAttn+Syncnet | 87.5        | 81.0        | 80.2        | 79.6        |
| Deformable Attn        | 87.5        | 81.4        | 78.6        | 78.1        |
| LRCP (ours)            | <b>87.5</b> | <b>86.8</b> | <b>85.6</b> | <b>83.4</b> |

Table 7. Comparison of 3D detection performance on the Dair-V2X

| Latency(ms)            | 0           | 100         | 200         | 300         | 400         | 500         |
|------------------------|-------------|-------------|-------------|-------------|-------------|-------------|
| Single                 | 67.4        |             |             |             |             |             |
| Metric                 | AP@0.5      |             |             |             |             |             |
| V2X-ViT                | 71.5        | 70.4        | 69.1        | 68.1        | 67.1        | 66.5        |
| Openv2v                | 73.0        | 72.3        | 71.3        | 70.2        | 69.9        | 69.6        |
| Where2comm             | 80.1        | 78.5        | 73.7        | 71.2        | 69.5        | 68.7        |
| Cobeflow               | 80.1        | 79.0        | 75.6        | 74.0        | 73.3        | 73.1        |
| DeformableAttn+Syncnet | <b>80.9</b> | 78.7        | 74.3        | 72.8        | 71.6        | 70.6        |
| Deformable Attn        | <b>80.9</b> | 79.4        | 74.6        | 71.3        | 69.6        | 68.3        |
| LRCP (ours)            | 80.5        | <b>80.5</b> | <b>80.3</b> | <b>80.0</b> | <b>79.6</b> | 79.1        |
| Metric                 | AP@0.7      |             |             |             |             |             |
| Single                 | 58.7        |             |             |             |             |             |
| Latency (ms)           | 0           | 100         | 200         | 300         | 400         | 500         |
| V2X-ViT                | 54.7        | 54.0        | 53.4        | 53.1        | 52.9        | 52.7        |
| Openv2v                | 58.0        | 57.2        | 56.5        | 56.3        | 56.4        | 56.3        |
| Where2comm             | 67.3        | 61.2        | 58.8        | 58.3        | 58.0        | 57.6        |
| Cobeflow               | 67.3        | 62.4        | 61.1        | 60.3        | 59.5        | 59.0        |
| Def. Attn+Syncnet      | <b>70.1</b> | 64.5        | 62.1        | 61.9        | 61.3        | 61.1        |
| Deformable Attn        | <b>70.1</b> | 64.1        | 61.0        | 60.2        | 59.6        | 58.9        |
| LRCP (ours)            | 69.5        | <b>69.1</b> | <b>68.4</b> | <b>67.8</b> | <b>67.2</b> | <b>66.5</b> |
